# Supplementary material for: The browning of white adipose tissue and body weight loss in primary hyperparathyroidism
Source: PubMed Central journal article supplement — eBioMedicine. 2018 Dec 7;40:56–66. doi: 10.1016/j.ebiom.2018.11.057 (PMC6412009; doi:10.1016/j.ebiom.2018.11.057), 2018-12-07
Supplement: mmc1.pdf [file mmc1.pdf]

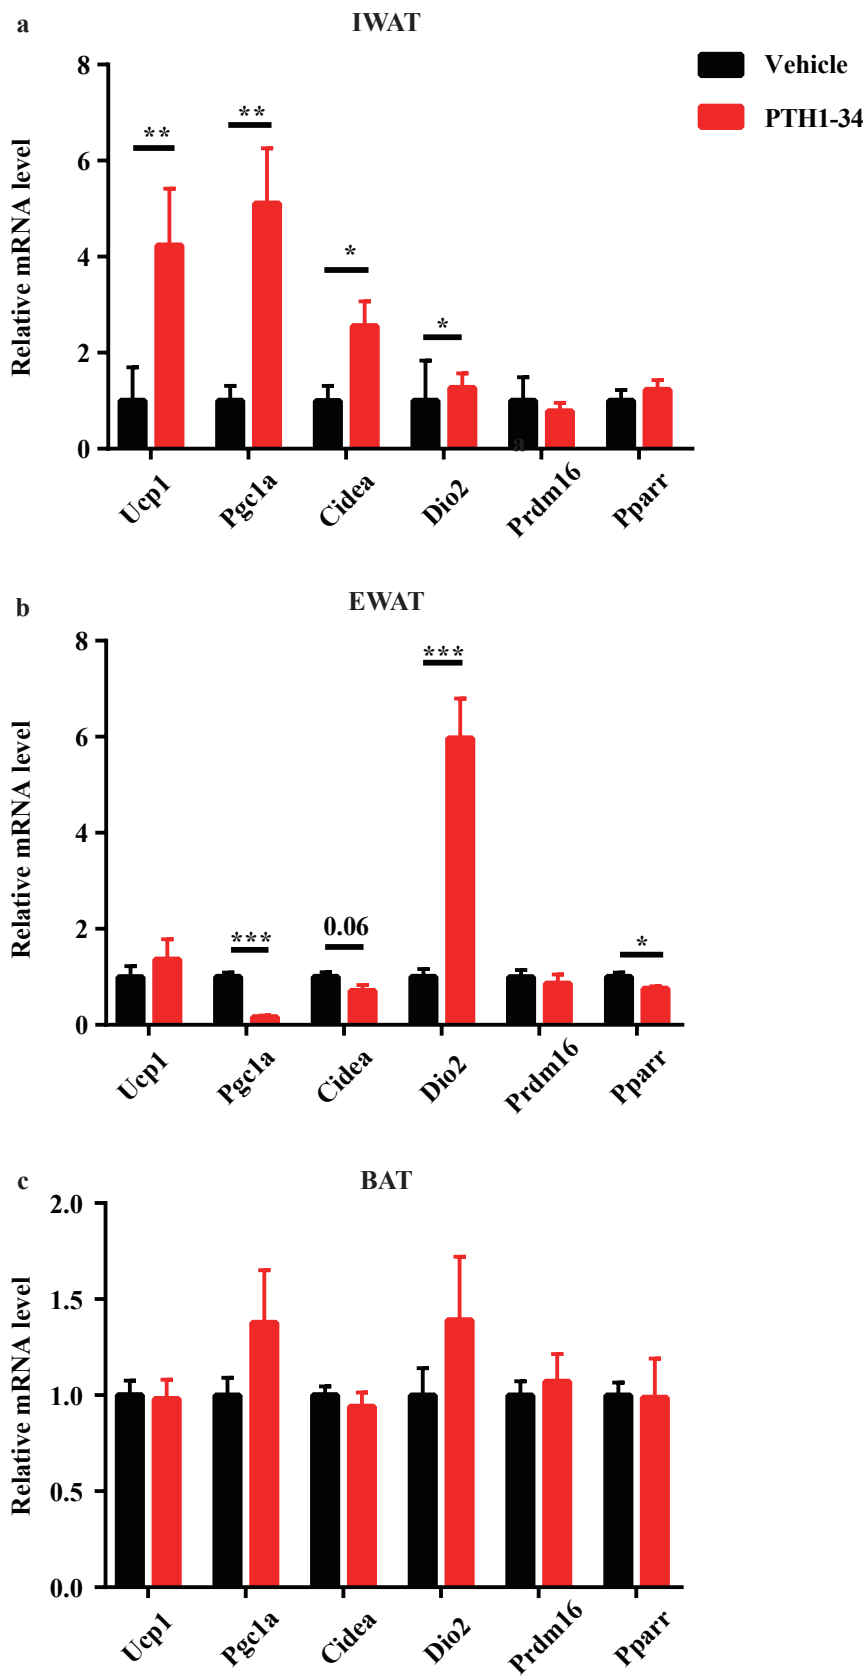

Suppl Figure 1

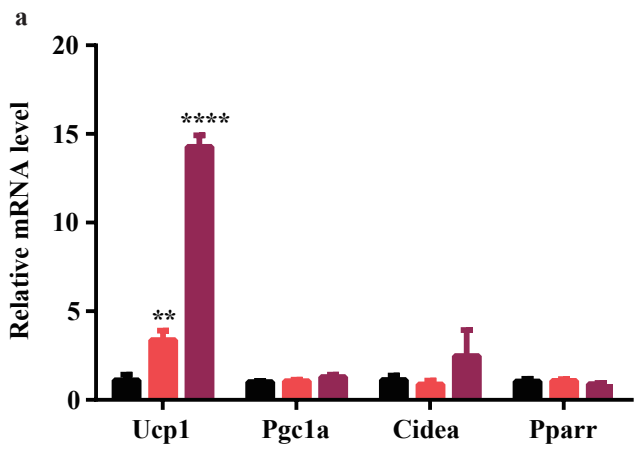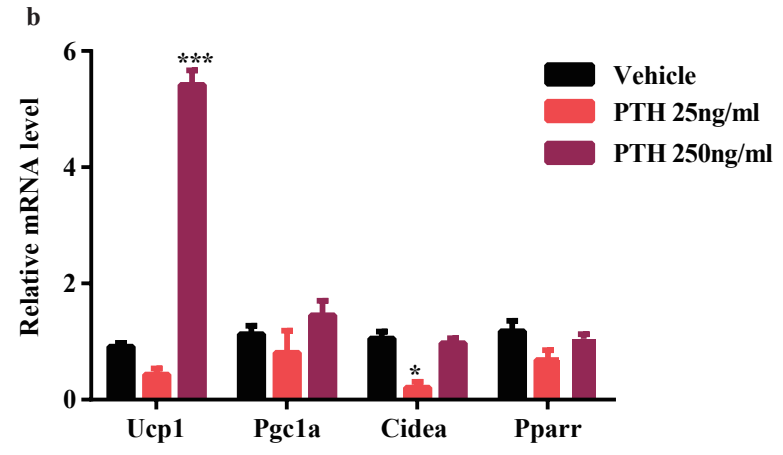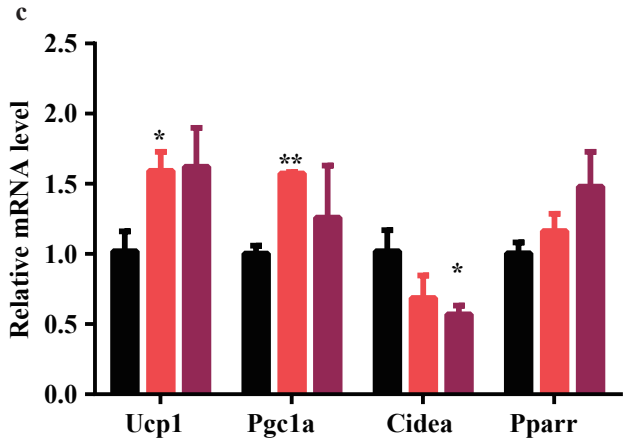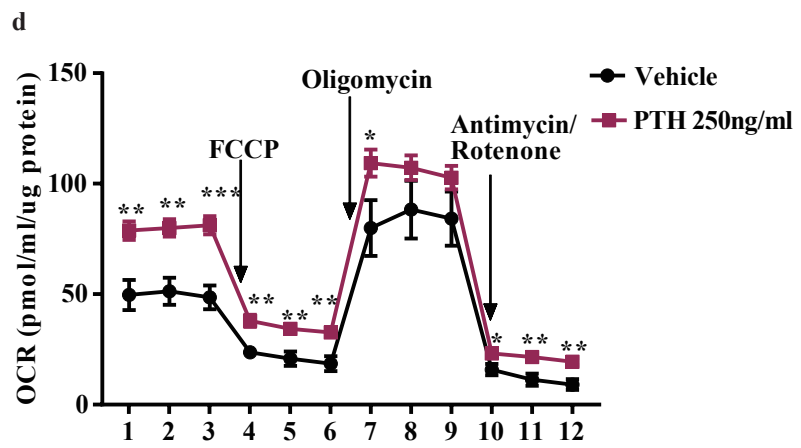

Suppl Figure 2

**Suppl Table 1 The association between clinical index and BMI in PHPT patients**

|                               | $\beta$      | $R^2$         | $P$           |
|-------------------------------|--------------|---------------|---------------|
| <b>age</b>                    | <b>0.09</b>  | <b>0.0258</b> | <b>0.0003</b> |
| <b>Serum calcium (mmol/l)</b> | <b>-0.15</b> | <b>0.0137</b> | <b>0.0092</b> |
| Serum phosphorus (mmol/l)     | 0.04         | 0.0049        | 0.12          |
| 25(OH)D (mmol/l)              | -0.006       | 0.0005        | 0.65          |
| Scr (mmol/l)                  | 0.02         | 0.0037        | 0.188         |
| <b>Albumin (mmol/l)</b>       | <b>0.20</b>  | <b>0.021</b>  | <b>0.0016</b> |
